# Supplementary material for: Application of an inorganic sulfur-modified expanded graphite anode for sodium storage at low temperatures
Source: Royal Society of Chemistry journal article supplement (doi:10.1039/d1se01140e), 2021-01-01
Supplement: d1se01140e1.pdf [file d1se01140e1.pdf]

## Electronic Supplementary Information (ESI)

### Application of an inorganic sulfur-modified expanded graphite for sodium storage at low temperature

Li-Feng Zhou,<sup>a</sup> Yi-Jing Gao,<sup>b</sup> He Gong,<sup>a</sup> Li-Ying Liu<sup>a</sup> and Tao Du<sup>\*a</sup>

#### Experimental

##### Synthesis of S-EG

All chemicals utilized in this work were purchased from Aldrich and were of analytical grade without further purification. Initially, graphene oxide was prepared by the improved Hummers method.<sup>[1]</sup> Then the black powder was heated highly to 850 °C at a heating-rate of 10 °C min<sup>-1</sup> and kept for 30 min in the atmosphere of Ar, followed by a careful collection of expanded graphite (EG). EG and commercial sublimed sulfur with a mass ratio of 1:1 were fully mixed by ball-milling in Ar and then were placed a vacuum tube furnace in Ar. The heating process was divided into three parts, including 155 °C for 1h, 300 °C for 1h and 600 °C for 3h, respectively. Finally, expanded graphite expanded by few sulfur (S-EG) was carefully collected as a final sample.

##### Characterization

The phase analysis of the as-obtained products was characterized by a powder X-ray diffraction (XRD, Bruker D8 ADVANCE, Cu K $\alpha$  radiation,  $\lambda$ = 0.154 nm) at 40 kV, collected in the 2 $\theta$  range of 20~60° at a scanning speed of 5° min<sup>-1</sup>. The morphologies and corresponding elemental mapping images were analyzed by scanning electron microscopy (SEM, Zeiss Ultra Plus, accelerating voltage: 15kV) and transmission electron microscopy (TEM, FEI Tecnai G2 F20, Accelerating voltage: 200kV). The element distribution was evaluated by X-ray photoelectron spectroscopy (XPS, Escalab 250 Xi) spectrum, using C 1s (Binding Energy: 284.6 eV) as a reference. N<sub>2</sub> adsorption/desorption isotherms were measured at liquid nitrogen temperature using ASAP 2460. Raman spectra were recorded on a Raman microprobe (HR800, HORIBA JY) with 632.8 nm laser excitation. Fourier transform infrared spectroscopy (FTIR) spectra were collected from a Cary 660 FTIR spectrometer (Agilent Technologies) with 32 scans at a resolution of 4 cm<sup>-1</sup>. Thermogravimetric analysis (TGA) was performed under the Ar atmosphere with the heating rate of 5 °C min<sup>-1</sup>.

##### Electrochemical measurements

Galvanostatic charge/discharge performance were tested by CR2032-type cells assembled in a glove box under the Ar atmosphere with the vapor and the oxygen content strictly below 0.1ppm. The working electrodes were prepared by mixing the as-prepared anodes with super P and polyvinylidene fluoride (PVDF) at a respective weight ratio of 7:2:1 in N-methyl pyrrolidone (NMP) solvent. The coin cells were assembled with 1 M sodium perchlorate (NaClO<sub>4</sub>) in a mixture of ethylene carbonate/dimethyl carbonate (EC/DMC) solution (1:1 in volume ratio) with 5wt% fluoroethylene carbonate (FEC) as the electrolyte, and the glass fiber membrane was the separator. Cyclic voltammetry (CV) and electrochemical impedance spectroscopy (EIS) measurements were performed on a CHI660E electrochemical station and a PARSTAT 2273 . electrochemical station, respectively. CV was collected at the different scan rates (0.1-2.0 mV s<sup>-1</sup>) from 0 to 2.5 V and the testing range of EIS was a perturbation voltage of 5 mV in the frequency range between 100 kHz and 0.01 Hz at room temperatures. Galvanostatic The cyclic and rate performances were tested in the voltage range of 0-2.5 V on Land CT2001A battery test system.

##### Computational details

Galvanostatic intermittence titration technique (GITT) technique was also tested by the LAND system. Before the test, the batteries were charged/discharged at 0.2C for ten cycles to age the batteries. The batteries were performed for 20

min interlarding with a 60 min relaxing time at 0.2C, which was used to calculate the Na<sup>+</sup> diffusion coefficient reflecting the kinetic behaviors of S-EG was calculated with the equation:

$$D_{\text{GIT}} = \frac{4}{\pi t} \left( \frac{m_B V_m}{M_B S} \right)^2 \left( \frac{\Delta E_s}{\Delta E_t} \right)^2 \quad (3)$$

where  $D_{\text{GIT}}$  is the ion diffusion coefficient,  $t$  is the relaxing time of the current pulse,  $m_b$  is the mass of active materials,  $V_m$  is its molar volume ( $\text{cm}^3 \text{mol}^{-1}$ ),  $M_B$  is the molar mass ( $\text{g mol}^{-1}$ ),  $S$  is the total contacting area of electrode with electrolyte,  $\Delta E_s$  and  $\Delta E_t$  signify the steady-state potential change by the current pulse and potential change during the constant current ( $V$ ), which are eliminated with the  $iR$  drop.

The  $D_{\text{Na}^+}$  value can be determined according to the following Equation:

$$D_{\text{Na}^+} = \frac{R^2 \times T^2}{2A^2 \times n^4 \times F^4 \times C_{\text{Na}^+}^2 \times \sigma^2}$$

where  $R$  is the gas constant,  $T$  is the absolute temperature,  $A$  is the electrode area,  $n$  is the number of transferred electrons,  $F$  is the Faraday constant,  $C_{\text{Na}^+}$  is the Na<sup>+</sup> concentration, and  $\sigma$  is the coefficient of Warburg impedance which is the slope of  $Z_{\text{re}}$  vs.  $\omega^{1/2}$  plots.

Table S1 Comparison of low temperature properties of common carbon materials

| Materials                              | Temperature (°C) | Current density (mA g <sup>-1</sup> ) | Specific capacity (mAh g <sup>-1</sup> ) | Ref. |
|----------------------------------------|------------------|---------------------------------------|------------------------------------------|------|
| Se/graphene                            | -5               | 243                                   | 346                                      | [5]  |
| Hard carbon                            | 0                | 50                                    | 167                                      |      |
| Carbon nanosheets derived from corncob | 0                | 50                                    | 132                                      |      |
| Carbon nanosphere derived from glucose | 0                | 50                                    | 17                                       |      |

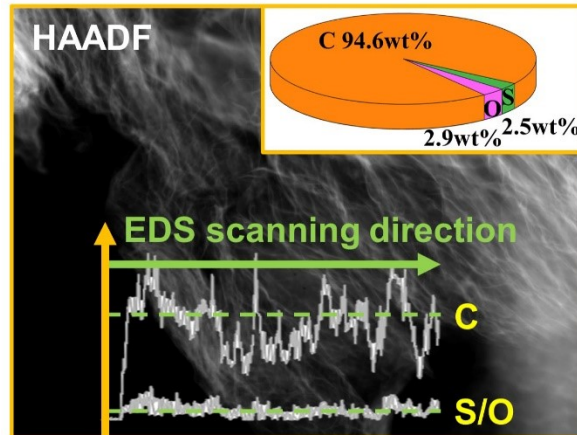

Figure S1 EDS line-scanning result based on a TEM-HAADF and element distribution ratio.

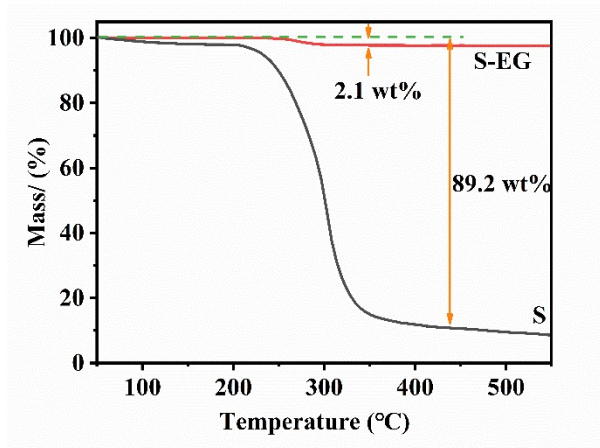

Figure S2 The mass loss of S-EG and S based on thermogravimetric analysis (TGA) under Ar atmosphere.

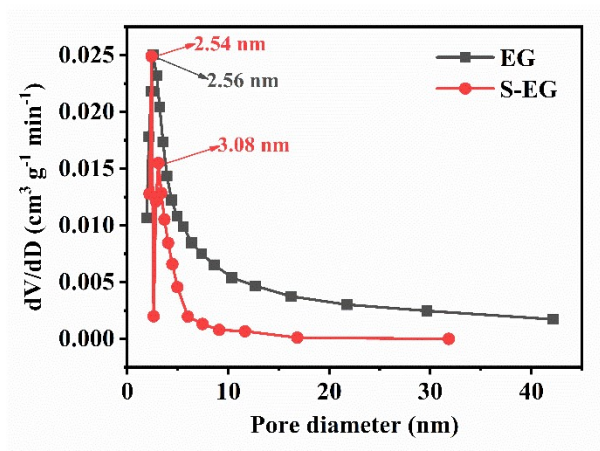

Figure S3 Pore distribution of EG and S-EG.

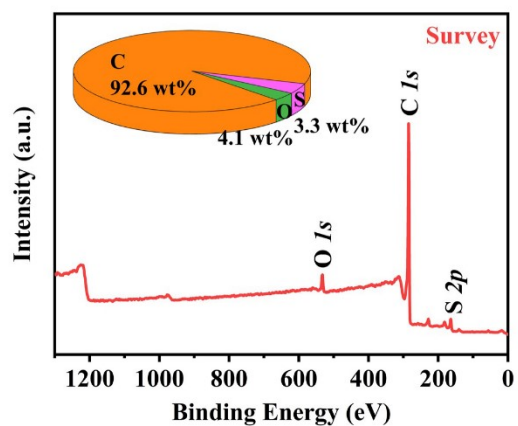

Figure S4 Survey scan spectrum contained the peaks of carbon, sulfur and oxygen, the inset was the element ratio

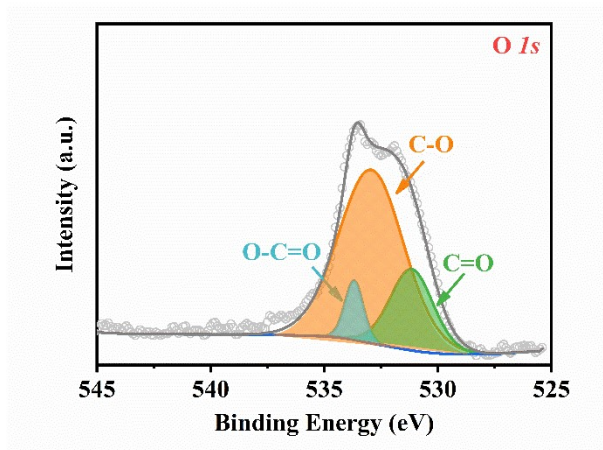

Figure S5 XPS high-resolution spectra of O 1s for S-EG.

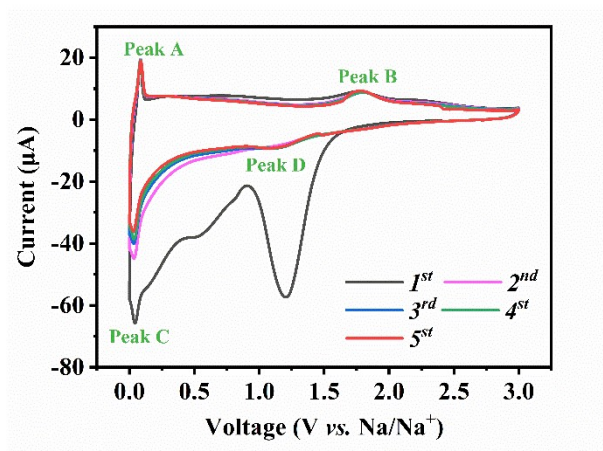

Figure S6 CV curves of the initial five cycles at 0.1 mV s<sup>-1</sup> at LT..

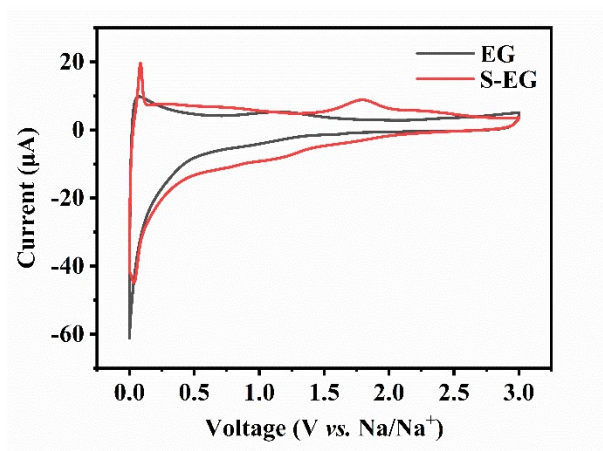

Figure S7 CV curves of EG and S-EG, respectively.

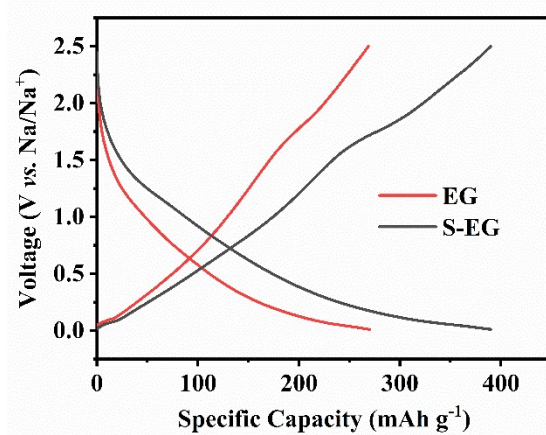

Figure S8 The 3<sup>rd</sup> charge and discharge profiles of EG and S-EG at 1.0C, respectively.

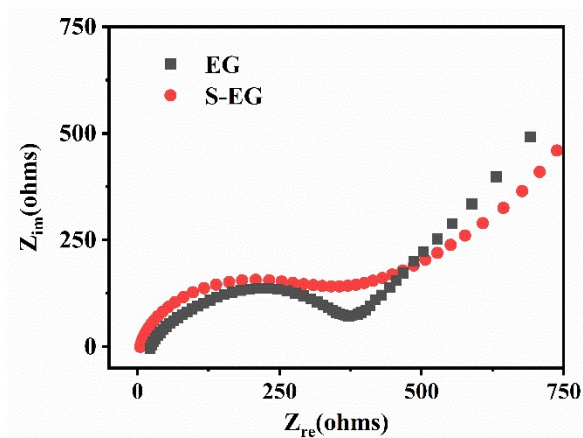

Figure S9 Nyquist plots of fresh cells employed EG and S-EG as anodes, respectively.

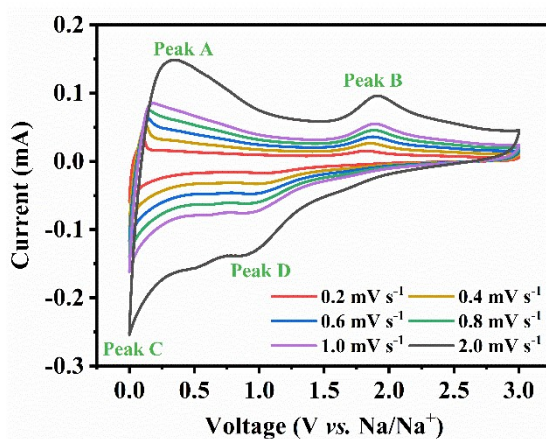

Figure S10 CV curves in the scan rate scope of 0.2 mV s<sup>-1</sup> and 2.0 mV s<sup>-1</sup>.

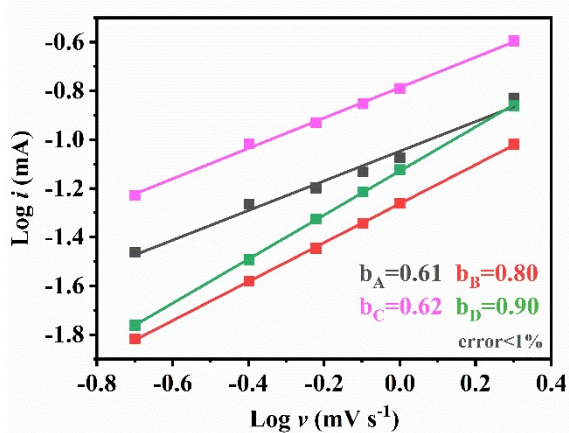

Figure S11 Plots of  $\text{Log } i$  vs.  $\text{Log } v$  calculated from CV curves and their fitting lines.

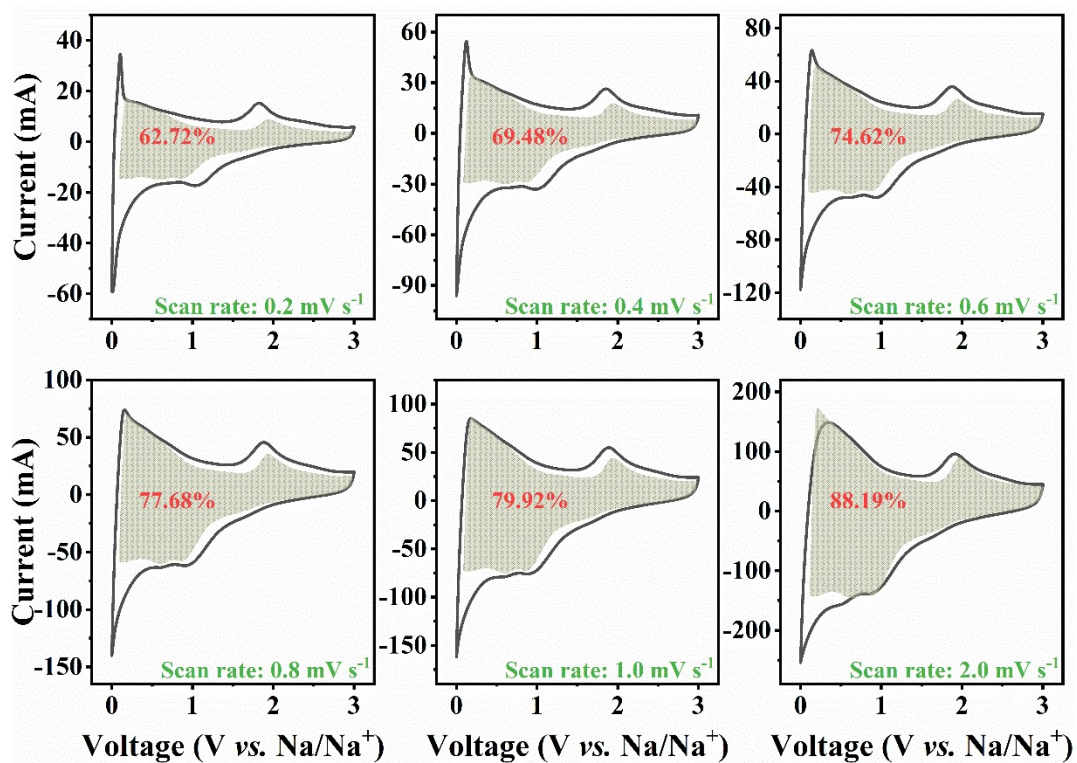

Figure S12 Calculated data of the capacitive control under various scan rates.

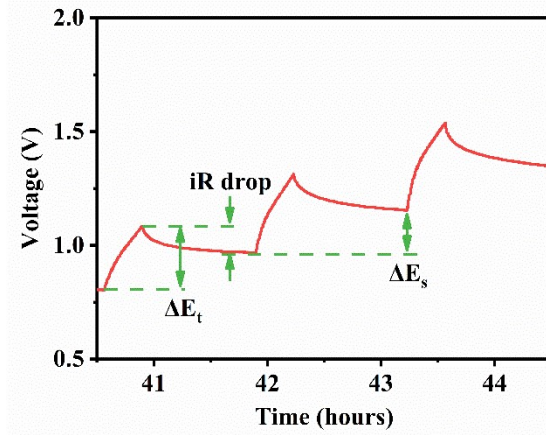

Figure S13 A voltage-time profile during a GITT measurement at 0.2C

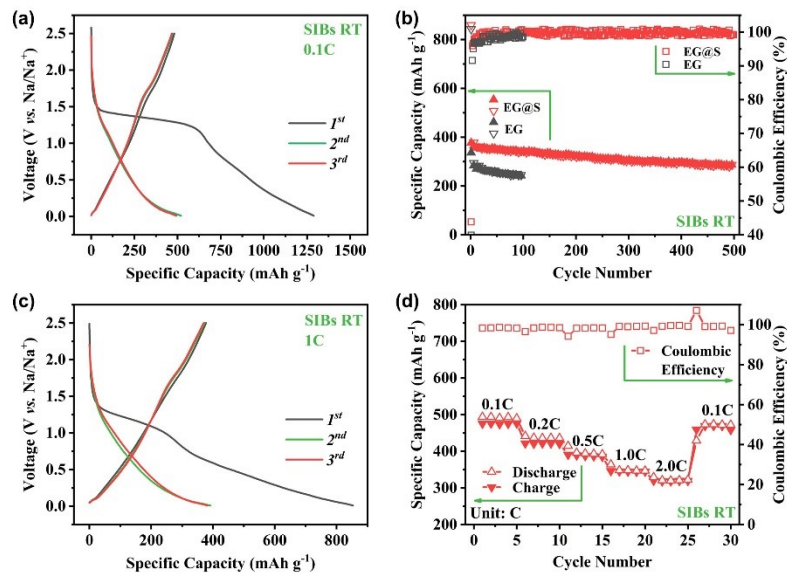

Figure S14 (a) Charge/discharge profiles of the initial three cycles at 0.1 C. (b) Cycle performance of S-EG and EG at 1C. (c) Charge/discharge profiles of the initial three cycles at 1 C (d) Rate performance of S-EG in the rate scope of 0.1 C and 2.0 C.

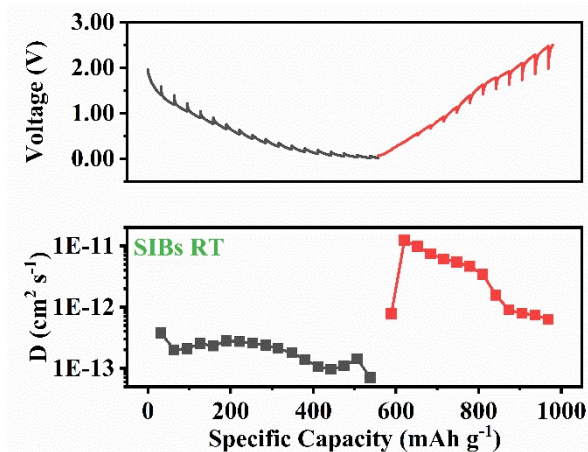

Figure S15 GITT curves and the calculate Na<sup>+</sup> diffusion coefficients

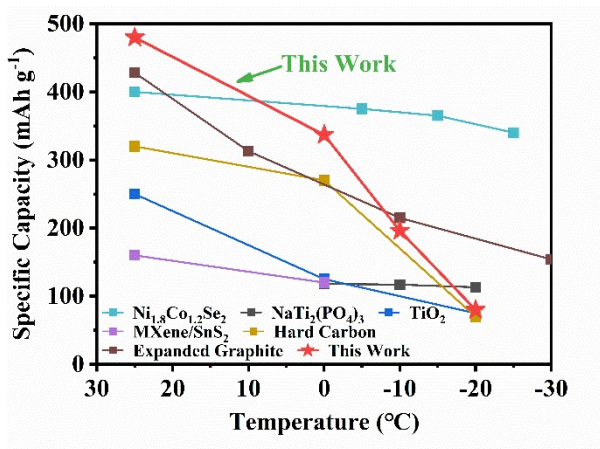

Figure S16 A comparison of the properties of this work with previously reported anode materials for SIBs at RT/LT.<sup>[2-7]</sup>

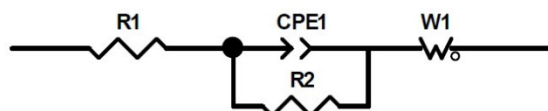

Figure S17 The fitting equivalent circuit.

## Refence

- [1] J. Chen, B. Yao, C. Li, G. Shi, Carbon 2013, 64, 225.
- [2] B.-H. Hou, Y.-Y. Wang, D.-S. Liu, Z.-Y. Gu, X. Feng, H. Fan, T. Zhang, C. Lu, X.-L. Wu, Advanced Functional Materials 2018, 28.
- [3] M. Kang, Y. Wu, X. Huang, K. Zhou, Z. Huang, Z. Hong, Journal of Materials Chemistry A 2018, 6, 22840.
- [4] L. Wang, B. Wang, G. Liu, T. Liu, T. Gao, D. Wang, Rsc Advances 2016, 6, 70277.
- [5] Y. Wu, P. Nie, L. Wu, H. Dou, X. Zhang, Chemical Engineering Journal 2018, 334, 932.
- [6] X. Lin, X. Du, P. S. Tsui, J.-Q. Huang, H. Tan, B. Zhang, Electrochimica Acta 2019, 316, 60.
- [7] L.-F. Zhou, H. Gong, L.-Y. Liu, Y.-S. Wang, T. Du, ChemNanoMat 2021.
